# Supplementary material
Source: publisher figshare collection journal article supplement (https://frontiersin.figshare.com/ndownloader/files/21997572)
Supplement: Supplementary file 1 [file 21997572]

## Sheet: results.082619
Table S1. Study species, measures of thermal tolerance (T50, GTopt, GTmax), changes in abundance (strikethourghs, e.g. XXX, indicate values that were deemed unreasonable or unreliable and thus were excluded from analyses)
Plot	Family	Species	T50 (95% CI)	N. Records		GTopt		GTmax		BA	BArel	ΔBA	ΔBArel
			(oC)	Species	Genus	Species (oC)	Genus (oC)	Species (oC)	Genus (oC)	(cm2)	(%)	(cm2 yr-1)	(% yr-1)
Angelopolis	Annonaceae	Guatteria lehmannii	47.97 (47.32 - 48.95)	1	1063	17.3267	24.2059	21.4	30.39	2553.4	1.00383	0.0663453	-8.48429e-08
Angelopolis	Brunelliaceae	Brunellia sibundoya	49.70 (48.83 - 50.28)	10	131	15.572	15.7716	24.495	26.9	4978.49	1.97428	-0.619484	-3.13033e-06
Angelopolis	Euphorbiaceae	Alchornea glandulosa	49.26 (48.20 - 49.68)	132	478	21.6858	21.414	30.3	30.1	1660.05	0.65583	-0.0824941	-5.56303e-07
Angelopolis	Euphorbiaceae	Croton smithianus	47.80 (46.68 - 48.91)	7	731	21.8322	22.0509	31.3	30.8	32522.7	12.8549	-1.9819	-1.23491e-05
Angelopolis	Euphorbiaceae	Sapium cuatrecasasii	48.47 (47.84 - 49.31)	0	229	-	21.8523	-	30.4	2927.17	1.14902	0.152921	2.01844e-07
Angelopolis	Fabaceae	Abarema lehmannii	46.84 (45.60 - 47.79)	10	274	16.5053	23.6486	22.2	30.1	3009.63	1.18479	-0.0325931	-5.36122e-07
Angelopolis	Fagaceae	Quercus humboldtii	47.83 (39.07 - 50.23)	18	18	16.0343	16.0343	25.215	25.215	40979.4	16.0611	2.52486	4.51173e-06
Angelopolis	Hamamelidaceae	Matudaea colombiana	51.04 (45.42 - 52.63)	1	1	16.8488	16.8488	20.6	20.6	32173.2	12.6067	2.25372	4.57974e-06
Angelopolis	Hypericaceae	Vismia baccifera	47.16 (46.71 - 47.67)	52	525	22.8773	23.2541	29.69	30.4	2630.49	1.02752	0.275624	7.45842e-07
Angelopolis	Hypericaceae	Vismia laevis	47.66 (47.35 - 48.10)	16	525	16.5141	23.2541	26.85	30.4	143.851	0.0563409	0.0109763	2.41085e-08
Angelopolis	Hypericaceae	Vismia lauriformis	47.69 (47.47 - 47.93)	26	525	20.7692	23.2541	29.95	30.4	506.788	0.198886	0.0248609	2.97521e-08
Angelopolis	Hypericaceae	Vismia sp3	36.87 (30.96 - 44.98)	-	525	-	23.2541	-	30.4	1033.01	0.402417	0.147096	4.48314e-07
Angelopolis	Lauraceae	Ocotea sp5	49.17 (48.61 - 49.60)	-	1332	-	22.3216	-	30.6	658.473	0.256001	0.0131183	-1.66629e-08
Angelopolis	Lauraceae	Persea rigens	50.36 (49.39 - 51.26)	5	256	19.9989	17.8585	27.14	29.25	3750.98	1.49074	-0.448967	-2.29851e-06
Angelopolis	Melastomataceae	Miconia theaezans	45.31 (42.23 - 47.05)	112	7002	13.4862	20.3439	27.29	30.1	673.155	0.263688	0.0382146	6.24334e-08
Angelopolis	Proteaceae	Roupala sp1	49.64 (48.22 - 49.95)	-	101	-	20.6029	-	31.3	113.582	0.0447139	0.00134223	-1.02627e-08
Angelopolis	Rubiaceae	Guettarda crispiflora	49.51 (48.60 - 50.11)	9	104	19.9363	23.0413	26.54	31.27	9847.78	3.87071	0.186358	-5.88612e-07
Angelopolis	Sabiaceae	Meliosma sp4	47.59 (46.60 - 48.46)	-	242	-	20.4968	-	29.8	398.279	0.156662	0.00746523	-2.49715e-08
Angelopolis	Staphyleaceae	Turpinia occidentalis	46.29 (45.87 - 47.16)	93	94	20.7066	20.6562	29.98	29.97	4424.52	1.73682	0.194266	1.74849e-07
Angelopolis	Styracaceae	Styrax sp7	48.35 (47.54 - 49.10)	-	103	-	20.4269	-	30.09	236.115	0.0926951	0.0102667	8.68545e-09
Angelopolis	Symplocaceae	Symplocos quindiuensis	46.56 (45.03 - 47.43)	0	167	-	15.0154	-	29.31	796.4	0.317522	-0.0977064	-5.13169e-07
Angelopolis	Tapisciaceae	Huertea granadina	49.29 (48.42 - 49.74)	2	71	19.8019	22.2045	25.865	30.3	4330.97	1.7029	0.122513	-1.08483e-07
Anori	Anacardiaceae	Tapirira guianensis	51.66 (50.35 - 52.18)	287	361	23.9489	24.0359	30.7	30.6	10711.7	3.80969	0.322853	4.96376e-07
Anori	Apocynaceae	Lacmellea edulis	47.69 (47.04 - 48.82)	24	175	24.8569	24.4847	30.355	30.1	4230.38	1.50608	0.0790262	1.70065e-08
Anori	Burseraceae	Dacryodes cf. belemensis	47.50 (46.42 - 48.30)	3	373	24.277	23.3368	28.53	30	4563.18	1.62449	0.055516	-8.89479e-08
Anori	Chloranthaceae	Hedyosmum bonplandianum	49.11 (47.31 - 50.25)	21	670	18.2444	15.9879	25.7	27.8	611.165	0.218739	-0.100068	-3.98374e-07
Anori	Clusiaceae	Clusia sp1	50.35 (49.56 - 51.30)	-	1838	-	21.5437	-	29.7	1414.09	0.50312	0.047264	8.14082e-08
Anori	Clusiaceae	Dystovomita sp1	48.71 (48.25 - 49.21)	-	21	-	24.2496	-	29.4	184.278	0.0656195	-0.0203932	-8.53588e-08
Anori	Clusiaceae	Tovomita weddelliana	48.23 (47.71 - 48.92)	112	339	23.0672	24.0441	29.445	29.73	7281.59	2.58841	0.296142	6.05588e-07
Anori	Dichapetalaceae	Stephanopodium aptotum	48.26 (47.82 - 48.82)	2	18	16.8179	23.2666	21.1	28.65	333.193	0.118548	0.00964432	1.37465e-08
Anori	Euphorbiaceae	Alchornea coelophylla	49.46 (48.61 - 49.79)	12	478	18.7158	21.414	26.235	30.1	118.053	0.0419984	0.00436882	8.36985e-09
Anori	Fabaceae	Cynometra bauhiniifolia	48.25 (46.78 - 49.87)	9	27	25.4976	25.1411	31.68	31.24	0	0	-	-
Anori	Fagaceae	Quercus humboldtii	48.01 (47.42 - 48.99)	18	18	16.0343	16.0343	25.215	25.215	27732.2	9.87164	0.123182	-1.28343e-06
Anori	Lauraceae	Ocotea sp10	47.66 (46.19 - 49.17)	-	1332	-	22.3216	-	30.6	0	0	-	-
Anori	Lauraceae	Ocotea sp9	50.29 (49.13 - 51.63)	-	1332	-	22.3216	-	30.6	0	0	-	-
Anori	Lecythidaceae	Eschweilera sessilis	51.31 (49.80 - 51.60)	8	1123	18.8094	24.1488	26.18	30.1	5096.19	1.81339	0.148269	2.15275e-07
Anori	Melastomataceae	Miconia cf. reducens	49.09 (48.27 - 49.96)	0	7002	-	20.3439	-	30.1	342.149	0.121302	0.0278049	7.91735e-08
Anori	Melastomataceae	Miconia sp12	47.37 (46.99 - 47.75)	-	7002	-	20.3439	-	30.1	4310.05	1.53659	-0.215471	-1.04692e-06
Anori	Monimiaceae	Mollinedia minutiflora	49.17 (48.74 - 49.60)	1	308	25.8962	22.6558	28.7	30.1	128.334	0.0456792	0.00617459	1.40758e-08
Anori	Myristicaceae	Compsoneura sp1	47.93 (47.19 - 48.79)	-	315	-	24.7834	-	29.6	12191.4	4.33736	0.41281	7.16277e-07
Anori	Myristicaceae	Virola sebifera	45.64 (44.68 - 46.93)	233	1643	24.1435	24.5746	30.68	30.1	9507.51	3.3824	0.00699705	-5.74458e-07
Anori	Sapotaceae	Chrysophyllum cf. argenteum	48.35 (47.60 - 49.12)	87	348	24.3235	24.1878	30.47	30.3	21906.8	7.79305	0.715881	1.19751e-06
Anori	Sapotaceae	Chrysophyllum sp6	49.35 (48.58 - 50.21)	-	348	-	24.1878	-	30.3	4364.79	1.55043	0.247296	6.16579e-07
Belmira	Aquifoliaceae	Ilex laurina	57.47 (48.29 - 114.04)	17	599	16.7267	19.2693	26.76	29.7	536.427	0.226467	0.0418528	1.24949e-07
Belmira	Clusiaceae	Clusia alata	48.28 (47.59 - 48.91)	10	1838	16.5597	21.5437	24.96	29.7	3310.88	1.3955	0.352133	1.17519e-06
Belmira	Cunoniaceae	Weinmannia multijuga	50.35 (49.43 - 51.11)	24	666	13.915	14.2088	26.06	26.3	2669.1	1.12703	0.187117	5.36071e-07
Belmira	Fagaceae	Quercus humboldtii	48.91 (47.34 - 50.30)	18	18	16.0343	16.0343	25.215	25.215	184915	78.2929	3.51052	-3.38799e-06
Belmira	Hypericaceae	Vismia sp1	44.98 (42.35 - 48.65)	-	525	-	23.2541	-	30.4	723.69	0.30553	0.0522404	1.51735e-07
Belmira	Lauraceae	Persea mutisii	48.45 (47.72 - 49.40)	24	256	13.7425	17.8585	21.76	29.25	708.836	0.301043	-0.0266105	-1.83892e-07
Belmira	Melastomataceae	Miconia jahnii	47.98 (46.66 - 49.52)	28	7002	12.7486	20.3439	21.5	30.1	763.198	0.324182	-0.0393148	-2.41106e-07
Belmira	Melastomataceae	Miconia micropetala	49.18 (48.57 - 50.47)	38	7002	14.9766	20.3439	24.49	30.1	687.125	0.292705	-0.0563621	-3.11252e-07
Belmira	Melastomataceae	Miconia multiplinervia	48.28 (47.87 - 48.58)	7	7002	16.0176	20.3439	22.93	30.1	284.862	0.118792	0.0847198	3.35581e-07
Belmira	Melastomataceae	Miconia superposita	46.86 (44.03 - 49.48)	2	7002	9.91012	20.3439	14.26	30.1	336.443	0.142247	0.0135704	2.47957e-08
Belmira	Pentaphylacaceae	Ternstroemia macrocarpa	49.57 (48.75 - 49.88)	5	104	13.5585	19.3918	23.5	29.87	249.053	0.104826	0.0325145	1.13891e-07
Belmira	Primulaceae	Myrsine coriacea	49.64 (47.94 - 51.41)	160	402	15.6355	14.8347	27.015	27.78	1503.2	0.63642	0.0156684	-7.79865e-08
Belmira	Rubiaceae	Ladenbergia macrocarpa	46.92 (45.72 - 47.51)	27	207	16.8893	21.5168	26.43	30.37	1831.12	0.776047	-0.00869552	-2.16511e-07
Belmira	Sapindaceae	Billia rosea	47.76 (46.32 - 48.97)	12	44	19.376	19.7633	27.125	29.585	1361.5	0.573513	0.150032	5.07912e-07
Belmira	Symplocaceae	Symplocos flosfragrans	50.93 (49.68 - 53.46)	6	167	13.7338	15.0154	19.55	29.31	466.935	0.199841	-0.0751385	-3.71383e-07
Belmira	Symplocaceae	Symplocos sp2	46.85 (46.21 - 47.81)	-	167	-	15.0154	-	29.31	99.5925	0.0421398	0.00296075	2.81828e-09
Belmira	Theaceae	Gordonia fruticosa	48.57 (47.1 - 51.570)	65	69	16.2937	16.3241	28.5	28.5	1568.05	0.663143	0.0641955	1.17835e-07
Caicedo	Aquifoliaceae	Ilex danielis	65.51 (56.36 - 84.61)	5	599	15.7023	19.2693	21.94	29.7	637.696	0.229823	0.00229809	6.26863e-09
Caicedo	Araliaceae	Dendropanax macrophyllus	51.31 (50.92 - 51.69)	2	176	17.5352	23.9173	24.605	30.225	246.291	0.0889168	-0.166684	-4.52503e-07
Caicedo	Clusiaceae	Clusia alata	49.64 (48.25 - 51.63)	10	1838	16.5597	21.5437	24.96	29.7	2643.23	0.953311	-0.766694	-2.08133e-06
Caicedo	Cunoniaceae	Weinmannia balbisiana	49.70 (46.28 - 50.72)	24	666	16.3038	14.2088	24.855	26.3	25164.6	9.06492	0.623703	1.68114e-06
Caicedo	Euphorbiaceae	Alchornea verticillata	48.78 (46.61 - 50.25)	0	478	-	21.414	-	30.1	20575.9	7.41191	-0.0442746	-1.31898e-07
Caicedo	Lauraceae	Beilschmiedia costaricensis	50.25 (49.50 - 51.37)	30	59	19.3699	18.991	27.7	29.4	28343.3	10.2109	0.915962	2.47691e-06
Caicedo	Lauraceae	Beilschmiedia latifolia	49.03 (47.57 - 49.69)	6	59	13.5791	18.991	21.475	29.4	180.891	0.0651739	0.00864314	2.34292e-08
Caicedo	Lauraceae	Ocotea balanocarpa	48.19 (46.90 - 49.67)	3	1332	12.0142	22.3216	17.46	30.6	21226.5	7.64797	1.42699	3.87213e-06
Caicedo	Lauraceae	Ocotea sp14	48.20 (46.55 - 50.53)	-	1332	-	22.3216	-	30.6	14242	5.13167	-0.202348	-5.53274e-07
Caicedo	Lauraceae	Persea areolatocostae	48.76 (46.49 - 50.25)	17	256	22.1694	17.8585	29.4	29.25	7718.25	2.78099	0.539439	1.46421e-06
Caicedo	Melastomataceae	Miconia dolichopoda	47.45 (46.14 - 48.25)	6	7002	16.2928	20.3439	22	30.1	1159.38	0.417908	-0.400218	-1.08747e-06
Caicedo	Melastomataceae	Miconia wurdackii	48.04 (47.16 - 48.59)	8	7002	13.9697	20.3439	22.725	30.1	90.5199	0.0326269	0.00126158	3.44711e-09
Caicedo	Phyllanthaceae	Hieronyma antioquensis	46.67 (44.08 - 48.83)	5	284	14.2415	18.8605	18.48	29.4	6337.44	2.28327	0.0632853	1.6979e-07
Caicedo	Piperaceae	Piper obliquum	49.33 (47.88 - 50.60)	174	5204	22.7272	22.3757	30.435	30.2	2765.38	0.996232	0.00865535	2.22682e-08
Caicedo	Rubiaceae	Agouticarpa williamsii	50.03 (49.17 - 50.80)	12	73	21.6352	23.5772	27.87	30	108.168	0.0389785	0.00287288	7.79738e-09
Caicedo	Rubiaceae	Palicourea garciae	47.62 (46.52 - 48.54)	23	2561	16.6496	20.5761	26.11	29.9	2552.72	0.919662	-0.398607	-1.08444e-06
Caicedo	Sapindaceae	Billia rosea	50.82 (49.55 - 51.5)	12	44	19.376	19.7633	27.125	29.585	8524.88	3.07183	0.515314	1.39917e-06
Caicedo	Staphyleaceae	Turpinia occidentalis	48.84 (47.21 - 50.02)	93	94	20.7066	20.6562	29.98	29.97	1083.76	0.390576	0.0326033	8.86226e-08
Caicedo	Styracaceae	Styrax sp3	48.07 (47.24 - 48.78)	-	103	-	20.4269	-	30.09	93.4191	0.0336615	0.000419979	1.12458e-09
Jardin	Cunoniaceae	Weinmannia balbisiana	47.98 (46.99 - 48.94)	24	666	16.3038	14.2088	24.855	26.3	2034.6	0.650946	-0.128288	-3.73208e-07
Jardin	Euphorbiaceae	Alchornea acutifolia	49.52 (48.01 - 49.89)	3	478	16.838	21.414	26.74	30.1	169.542	0.0542392	0.0042738	4.90886e-09
Jardin	Euphorbiaceae	Alchornea verticillata	47.46 (45.45 - 49.44)	0	478	-	21.414	-	30.1	8923.93	2.85215	0.438747	7.86912e-07
Jardin	Lauraceae	Ocotea floribunda	48.84 (47.04 - 50.13)	31	1332	22.7989	22.3216	29.8	30.6	9569.43	3.06488	-0.88471	-2.44946e-06
Jardin	Lecythidaceae	Eschweilera antioquensis	48.92 (48.56 - 49.25)	36	1123	17.3983	24.1488	29.45	30.1	30130.8	9.64376	-0.66346	-2.57429e-06
Jardin	Melastomataceae	Clidemia sp	47.25 (45.25 - 48.08)	-	1755	-	23.797	-	30.5	2243.28	0.717391	0.143943	2.76423e-07
Jardin	Melastomataceae	Miconia acanthocoryne	47.92 (47.41 - 49.00)	1	7002	21.0938	20.3439	24.3	30.1	4191.46	1.33964	0.250066	4.75346e-07
Jardin	Melastomataceae	Miconia dolichopoda	49.16 (48.72 - 49.67)	6	7002	16.2928	20.3439	22	30.1	2194.24	0.702137	0.0590798	7.16556e-08
Jardin	Phyllanthaceae	Hieronyma antioquensis	50.23 (49.52 - 51.40)	5	284	14.2415	18.8605	18.48	29.4	17249.6	5.51778	-0.188142	-9.95871e-07
Jardin	Piperaceae	Piper imperiale	46.43 (45.87 - 47.85)	28	5204	24.5356	22.3757	28.865	30.2	5957.53	1.90588	-0.0877363	-3.99712e-07
Jardin	Rubiaceae	Ladenbergia macrocarpa	48.69 (47.77 - 49.57)	27	207	16.8893	21.5168	26.43	30.37	6621.7	2.12014	-0.18509	-6.64319e-07
Jardin	Rubiaceae	Palicourea andaluciana	48.08 (46.92 - 49.19)	17	2561	17.466	20.5761	24.56	29.9	4209.55	1.34559	0.300936	5.9623e-07
Jardin	Rubiaceae	Palicourea demissa	49.17 (47.81 - 51.31)	77	2561	16.4848	20.5761	25.04	29.9	1823.39	0.584428	-0.179798	-4.96023e-07
Jardin	Rubiaceae	Remijia sp1	49.56 (48.56 - 51.16)	-	138	-	23.5597	-	29.2	2787.07	0.890862	0.147079	2.69457e-07
Jardin	Sabiaceae	Meliosma sp2	48.88 (48.62 - 49.04)	-	242	-	20.4968	-	29.8	414.584	0.132632	0.00275462	-6.52078e-09
Jardin	Sapindaceae	Billia rosea	48.97 (47.88 - 50.14)	12	44	19.376	19.7633	27.125	29.585	34784.1	11.1247	0.187869	-6.32984e-07
Jardin	Urticaceae	Cecropia sp2	49.18 (48.61 - 49.94)	-	525	-	23.4018	-	30.4	9422.25	3.01338	0.539117	1.00282e-06
Maceo	Annonaceae	Guatteria aberrans	48.57 (46.13 - 50.28)	1	1063	23.544	24.2059	26.4	30.39	957.097	0.390118	0.0146113	9.60652e-09
Maceo	Annonaceae	Guatteria recurvisepala	48.94 (48.10 - 49.62)	24	1063	23.675	24.2059	31.9	30.39	1641.51	0.669071	-0.167047	-5.7513e-07
Maceo	Arecaceae	Wettinia hirsuta	50.55 (49.59 - 51.33)	0	205	-	21.1729	-	29.4	1888.77	0.768098	0.247158	6.97868e-07
Maceo	Burseraceae	Tetragastris panamensis	52.93 (50.74 - 53.87)	138	180	24.6924	24.759	30.96	30.915	14091.2	5.74575	0.0819173	-2.76253e-07
Maceo	Cardiopteridaceae	Dendrobangia boliviana	48.81 (47.79 - 50.23)	64	66	24.2413	24.2688	30.1	30.1	91.3571	0.0372476	-0.0125843	-4.21705e-08
Maceo	Caryocaraceae	Caryocar glabrum	50.71 (49.62 - 51.77)	58	116	24.1868	24.2795	29.505	30.325	8762.43	3.56925	0.608343	1.55824e-06
Maceo	Clusiaceae	Tovomita weddelliana	50.55 (49.97 - 51.08)	112	339	23.0672	24.0441	29.445	29.73	800.63	0.326134	0.0137339	1.34742e-08
Maceo	Combretaceae	Buchenavia tetraphylla	48.99 (48.28 - 49.79)	10	170	23.8604	24.6017	30.225	30.2	1237.07	0.504047	0.0768353	1.91565e-07
Maceo	Euphorbiaceae	Pera arborea	51.39 (51.08 - 51.86)	10	117	25.9397	24.3209	32.5	31.48	2296.67	0.935	0.341101	9.69784e-07
Maceo	Fabaceae	Abarema barbouriana	48.99 (48.19 - 50.14)	37	274	23.8265	23.6486	28.82	30.1	186.1	0.0758421	0.00615848	1.21346e-08
Maceo	Lauraceae	Aniba perutilis	49.80 (48.28 - 51.74)	11	333	23.9692	23.7157	30.1	30.4	10965.1	4.46597	0.948788	2.52928e-06
Maceo	Lauraceae	Ocotea sp14	51.65 (50.93 - 52.41)	-	1332	-	22.3216	-	30.6	0	0	-	-
Maceo	Melastomataceae	Miconia elata	49.99 (49.11 - 50.91)	27	7002	23.9281	20.3439	30.11	30.1	7032.21	2.86681	-0.234964	-9.85287e-07
Maceo	Melastomataceae	Miconia sp3	48.21 (47.52 - 49.22)	-	7002	-	20.3439	-	30.1	834.005	0.341974	-0.302525	-9.70051e-07
Maceo	Moraceae	Maquira guianensis	50.65 (50.21 - 51.04)	44	110	24.9545	24.7377	29.8	30.4	12636.8	5.15096	0.322075	5.24466e-07
Maceo	Myristicaceae	Virola flexuosa	50.15 (48.80 - 51.88)	61	1643	24.7002	24.5746	30.6	30.1	9446.68	3.84961	0.359576	7.61557e-07
Maceo	Myrtaceae	Myrcia splendens	49.67 (48.24 - 51.78)	68	740	23.3188	22.492	31.05	30.6	5086.41	2.07194	0.3026	7.48719e-07
Maceo	Rubiaceae	Coussarea grandifolia	48.00 (46.94 - 49.01)	3	563	24.0007	23.9294	28.56	30.19	5821.34	2.37304	-0.297669	-1.1328e-06
Maceo	Rubiaceae	Warszewiczia cf. uxpanapensis	49.33 (48.87 - 50.36)	0	236	-	24.2145	-	30.2	3037.84	1.23793	0.154521	3.64789e-07
Maceo	Urticaceae	Pourouma bicolor	43.78 (39.65 - 48.20)	104	631	24.3306	24.3194	30.185	30.2	2006.95	0.818234	0.0517602	8.45449e-08
Porce	Anacardiaceae	Tapirira guianensis	48.25 (44.80 - 51.00)	287	361	23.9489	24.0359	30.7	30.6	0	0	-	-
Porce	Asteraceae	Piptocoma discolor	46.44 (44.04 - 47.81)	38	54	22.3943	22.5714	29.83	32.5	636.383	0.300104	0.151062	4.47639e-07
Porce	Boraginaceae	Cordia bicolor	44.77 (43.60 - 45.80)	45	929	23.8237	23.1914	30.86	30.9	18095	8.6254	-0.109374	-3.41315e-06
Porce	Burseraceae	Tetragastris panamensis	48.07 (45.27 - 51.59)	138	180	24.6924	24.759	30.96	30.915	847.145	0.402783	0.0511064	4.35544e-08
Porce	Chrysobalanaceae	Licania sp6	50.93 (49.66 - 52.87)	-	812	-	24.6073	-	30.6	237.914	0.113139	0.013039	7.56689e-09
Porce	Euphorbiaceae	Pera arborea	52.96 (52.30 - 54.15)	10	117	25.9397	24.3209	32.5	31.48	12510.7	5.93394	1.50022	3.35628e-06
Porce	Fabaceae	Cassia moschata	47.52 (46.04 - 48.21)	12	65	26.0273	24.1139	33.3	33.26	1873.74	0.886881	0.329986	8.82021e-07
Porce	Lacistemataceae	Lacistema aggregatum	47.30 (46.44 - 48.86)	223	294	23.8071	24.0155	30.6	30.535	321.762	0.156552	-0.155616	-6.2284e-07
Porce	Melastomataceae	Miconia sp3	48.68 (47.34 - 51.89)	-	7002	-	20.3439	-	30.1	926.924	0.440402	0.0793257	1.30567e-07
Porce	Melastomataceae	Miconia trinervia	48.83 (47.21 - 50.91)	106	7002	24.3907	20.3439	31	30.1	2858.75	1.36627	-0.166139	-1.09239e-06
Porce	Moraceae	Brosimum guianense	50.20 (48.52 - 51.85)	121	535	25.059	24.7896	30.6	30.6	0	0	-	-
Porce	Myristicaceae	Virola sebifera	47.91 (46.77 - 49.39)	233	1643	24.1435	24.5746	30.68	30.1	6055.9	2.8807	0.342034	2.12493e-07
Porce	Rosaceae	Prunus sp1	48.03 (47.26 - 49.00)	-	224	-	19.1256	-	29.8	140.305	0.0667262	0.0070103	2.17977e-09
Porce	Salicaceae	Casearia grandiflora	49.53 (48.17 - 51.23)	0	0	-	-	-	0	122.971	0.0601568	-0.0830515	-3.21679e-07
Porce	Sapotaceae	Manilkara chicle	52.21 (48.88 - 54.45)	0	46	-	25.1797	-	30.4	583.404	0.276033	0.106941	2.90394e-07
Porce	Urticaceae	Pourouma bicolor	49.66 (46.88 - 51.67)	104	631	24.7562	24.8262	30.2	30.2	0	0	-	-
Puerto Triunfo	Annonaceae	Ephedranthus colombianus	50.16 (49.6 - 50.72)	3	19	26.0213	25.2411	30.9	30.9	7739.07	4.05712	-0.319227	-3.47162e-06
Puerto Triunfo	Annonaceae	Oxandra sp2	48.78 (48.33 - 49.41)	-	253	-	24.7893	-	30.4	2212.78	1.16334	-0.184068	-1.39318e-06
Puerto Triunfo	Bignoniaceae	Jacaranda hesperia	47.07 (46.32 - 48.04)	21	293	24.703	24.0823	32.2	30.9	189.206	0.0984473	0.0226833	3.71376e-08
Puerto Triunfo	Celastraceae	Maytenus macrocarpa	51.86 (49.76 - 53.06)	42	238	23.0538	21.7209	30.4	31.3	2846.54	1.49417	-0.213609	-1.64853e-06
Puerto Triunfo	Chrysobalanaceae	Licania sp5	47.83 (46.75 - 49.13)	-	812	-	24.6073	-	30.6	0	0	-	-
Puerto Triunfo	Fabaceae	Brownea rosa-de-monte	48.19 (47.59 - 49.00)	10	262	24.9415	24.5182	31.085	31.095	822.635	0.429623	0.0321402	-1.04344e-07
Puerto Triunfo	Fabaceae	Swartzia simplex	50.71 (49.21 - 52.62)	100	831	24.2709	24.4846	30	30.2	2903.99	1.51735	0.104507	-4.17039e-07
Puerto Triunfo	Fabaceae	Uribea tamarindoides	48.86 (48.10 - 49.90)	1	1	26.2767	26.2767	29.8	29.8	461.919	0.238021	0.147609	4.61238e-07
Puerto Triunfo	Lauraceae	Licaria sp3	47.38 (46.63 - 48.02)	-	154	-	24.0061	-	30.1	2661.18	1.38127	0.448196	1.04325e-06
Puerto Triunfo	Malvaceae	Pachira sp2	50.34 (49.97 - 50.74)	-	249	-	24.1164	-	30.1	509.046	0.26656	-0.0159458	-2.0333e-07
Puerto Triunfo	Moraceae	Brosimum alicastrum	49.08 (48.11 - 49.95)	69	535	24.9267	24.7896	30.2	30.6	5511.85	2.89263	-0.277621	-2.72528e-06
Puerto Triunfo	Polygonaceae	Coccoloba ascendens	48.03 (46.75 - 49.25)	22	467	24.809	24.4223	29.695	31.2	704.847	0.36759	0.0553078	1.75649e-08
Puerto Triunfo	Polygonaceae	Coccoloba padiformis	50.43 (48.95 - 51.97)	20	467	25.5205	24.4223	31.95	31.2	7078.25	3.70242	0.120075	-1.57555e-06
Puerto Triunfo	Rubiaceae	Alseis blackiana	49.62 (48.99 - 50.36)	3	51	25.3358	24.8121	29.59	31.25	214.787	0.112245	0.00607999	-3.69294e-08
Puerto Triunfo	Sapindaceae	Talisia sp2	48.33 (47.30 - 49.49)	-	184	-	24.7349	-	30.1	1151.76	0.606279	-0.130169	-8.60501e-07
Puerto Triunfo	Sapotaceae	Pouteria sp5	51.91 (51.27 - 52.57)	-	0	-	-	-	0	1482.03	0.770217	0.21077	4.24817e-07
Puerto Triunfo	Ulmaceae	Ampelocera cf. longissima	50.44 (49.91 - 51.36)	15	96	23.832	24.2988	29.4	30.95	1549.33	0.807511	0.139345	1.10743e-07
Puerto Triunfo	Violaceae	Rinorea hirsuta	50.16 (49.64 - 50.94)	5	677	25.4519	24.7495	30	30.4	258.204	0.134861	0.0110591	-2.98931e-08
Tamesis	Anacardiaceae	Astronium lecointei	53.01 (52.47 - 53.89)	18	44	25.4039	25.0372	31.355	31.8	7335.36	5.0081	0.143348	-1.50667e-07
Tamesis	Boraginaceae	Cordia panamensis	44.40 (41.47 - 51.83)	0	929	-	23.1914	-	30.9	10844.2	7.4056	0.13601	-6.30029e-07
Tamesis	Clusiaceae	Garcinia intermedia	57.69 (54.73 - 70.87)	7	167	24.4804	24.5054	28.66	30.44	70.66	0.0482315	0.00289867	6.14705e-09
Tamesis	Fabaceae	Dalbergia sp2	49.17 (45.99 - 50.86)	-	0	-	-	-	0	4672.06	3.18917	0.16496	2.75117e-07
Tamesis	Fabaceae	Machaerium biovulatum	50.69 (48.54 - 51.28)	6	342	21.0644	24.2903	27.05	31.295	1252.34	0.854783	0.0466286	8.70393e-08
Tamesis	Fabaceae	Pterocarpus sp1	49.83 (47.71 - 51.62)	-	137	-	24.8393	-	30.1	13325.1	9.09019	0.802381	2.51257e-06
Tamesis	Lauraceae	Licaria aff. applanata	50.43 (49.72 - 51.34)	8	154	16.5269	24.0061	28.5	30.1	1558.9	1.06514	-0.0098498	-2.45114e-07
Tamesis	Moraceae	Clarisia biflora	50.03 (48.42 - 51.24)	90	174	22.9408	23.5195	30.1	30.135	58751.8	40.121	0.896553	-2.62191e-06
Tamesis	Moraceae	Trophis racemosa	49.42 (47.24 - 50.80)	81	171	24.7285	24.0676	30.9	30.4	664.826	0.454009	-0.0103843	-1.2965e-07
Tamesis	Myrtaceae	Eugenia florida	49.62 (47.90 - 51.17)	0	0	-	-	-	0	89.8548	0.0613733	0.000230462	-9.8197e-09
Tamesis	Nyctaginaceae	Guapira costaricana	51.64 (50.32 - 53.17)	11	79	25.0454	24.2831	29.25	30.95	15737.5	10.7586	-0.606897	-5.05791e-06
Tamesis	Rubiaceae	Genipa americana	51.91 (51.45 - 52.27)	93	160	24.549	24.4953	31.44	31.3	4893.96	3.34822	-0.448359	-2.88949e-06
Tamesis	Rubiaceae	Guettarda roupalifolia	47.58 (41.18 - 51.10)	5	104	22.0943	23.0413	27.82	31.27	1085.16	0.742886	-0.0949216	-6.28214e-07
Tamesis	Salicaceae	Casearia aculeata	48.14 (46.69 - 49.15)	0	0	-	-	-	0	801.567	0.549175	-0.121788	-7.24514e-07
Tamesis	Sapindaceae	Cupania latifolia	49.19 (48.39 - 49.53)	33	199	22.558	23.5232	30.3	31.3	3028.04	2.06243	0.380716	1.60262e-06
Ventanas	Annonaceae	Guatteria lehmannii	48.87 (48.55 - 49.56)	1	1063	17.3267	24.2059	21.4	30.39	0	0	-	-
Ventanas	Aquifoliaceae	Ilex laurina	52.96 (50.30 - 56.51)	17	599	16.7267	19.2693	26.76	29.7	629.371	0.317586	-0.0268151	-1.71317e-07
Ventanas	Chloranthaceae	Hedyosmum cuatrecazanum	49.43 (47.83 - 51.80)	24	670	15.5266	15.9879	26.245	27.8	9784.25	4.93118	0.649677	1.36666e-06
Ventanas	Clethraceae	Clethra fagifolia	50.63 (49.13 - 52.28)	26	233	16.9824	14.6392	26.925	25.94	5003.53	2.51382	0.962511	3.12321e-06
Ventanas	Euphorbiaceae	Alchornea coelophylla	51.33 (49.59 - 52.70)	12	478	18.7158	21.414	26.235	30.1	16950.3	8.53554	1.71273	4.62445e-06
Ventanas	Euphorbiaceae	Alchornea grandiflora	50.36 (48.55 - 56.87)	46	478	18.2809	21.414	29.175	30.1	3689.32	1.85704	0.432728	1.23763e-06
Ventanas	Hypericaceae	Vismia laevis	48.88 (48.46 - 49.29)	16	525	16.5141	23.2541	26.85	30.4	11292.6	5.69593	0.0808985	-9.56006e-07
Ventanas	Melastomataceae	Meriania sp2	47.66 (46.92 - 49.09)	-	298	-	16.1389	-	28.845	2717.29	1.37005	0.118391	1.42487e-07
Ventanas	Melastomataceae	Miconia poeppigii	48.73 (48.04 - 49.39)	31	7002	24.254	20.3439	30.4	30.1	4796.76	2.42627	-0.401318	-2.09659e-06
Ventanas	Meliaceae	Ruagea pubescens	50.52 (49.55 - 51.61)	16	118	15.5466	15.7551	24.65	26.39	1044.17	0.526058	0.0438843	5.29552e-08
Ventanas	Myrtaceae	Eugenia dittocrepis	46.70 (45.46 - 48.09)	0	0	-	-	-	0	1649.99	0.829682	0.255304	7.91894e-07
Ventanas	Phyllanthaceae	Hieronyma duquei	48.07 (47.46 - 48.50)	47	284	18.1647	18.8605	25.61	29.4	14968.3	7.54669	0.723776	1.05596e-06
Ventanas	Phyllanthaceae	Hieronyma sp1	49.47 (48.88 - 50.68)	-	284	-	18.8605	-	29.4	785.915	0.396134	0.0469521	8.98563e-08
Ventanas	Phyllanthaceae	Richeria grandis	49.63 (48.17 - 51.29)	72	106	23.3549	23.9917	29.4	29.4	4417.65	2.2241	0.468722	1.29301e-06
Ventanas	Proteaceae	Panopsis sp1	50.22 (47.64 - 53.98)	-	89	-	22.1931	-	30.8	219.815	0.110446	0.0353079	1.11148e-07
Ventanas	Rosaceae	Prunus muris	48.97 (48.33 - 49.67)	1	224	14.219	19.1256	18.5	29.8	141.618	0.0719588	-0.0763279	-3.04981e-07
Ventanas	Rubiaceae	Elaeagia karstenii	49.66 (48.80 - 50.02)	2	112	16.6431	18.9353	21	28.5	2696.04	1.35927	0.0708806	-3.05626e-08
Ventanas	Rubiaceae	Elaeagia pastoensis	50.06 (49.17 - 50.67)	25	112	19.4313	18.9353	28.36	28.5	7193.28	3.62525	0.345129	5.12354e-07
Ventanas	Symplocaceae	Symplocos sp2	50.53 (47.49 - 55.71)	-	167	-	15.0154	-	29.31	0	0	-	-
